# Supplementary material for: Single Cell Transcriptome Analysis of Niemann–Pick Disease, Type C1 Cerebella
Source: Int J Mol Sci. 2020 Jul 28;21(15):5368. doi: 10.3390/ijms21155368 (PMC7432835; doi:10.3390/ijms21155368)
Supplement: Supplementary file 1 [file ijms-21-05368-s001.zip › Table S2 FDP.xlsx]

## Sheet: Table S2  FDP X
Cell Type	Direction	Annotation	Pathway	OR	p-value	Adjusted p-value
Arachnoid Barrier cells	increased	mmu03010	Ribosome	46.1872	0	0
Arachnoid Barrier cells	increased	GO:0003735	structural constituent of ribosome	31.9263	0	0
Arachnoid Barrier cells	increased	GO:0019843	rRNA binding	29.8789	6.11e-12	2.18e-09
Arachnoid Barrier cells	increased	GO:0005501	retinoid binding	21.9766	7.82e-05	0.00696806
Arachnoid Barrier cells	increased	GO:0051183	vitamin transporter activity	21.9766	7.82e-05	0.00696806
Arachnoid Barrier cells	increased	GO:0005520	insulin-like growth factor binding	17.933	2.21e-05	0.00262644
Arachnoid Barrier cells	increased	GO:0019840	isoprenoid binding	17.8524	0.000154049	0.0117627
Arachnoid Barrier cells	increased	GO:0005198	structural molecule activity	14.1597	0	0
Arachnoid Barrier cells	increased	GO:0001540	beta-amyloid binding	11.4187	0.00068397	0.0406202
Arachnoid Barrier cells	increased	GO:0050840	extracellular matrix binding	10.7971	4.21e-05	0.00450153
Arachnoid Barrier cells	increased	GO:0099516	ion antiporter activity	9.95215	0.000259818	0.0185164
Arachnoid Barrier cells	increased	GO:0019838	growth factor binding	9.00939	1.35e-08	3.62e-06
Arachnoid Barrier cells	increased	GO:0008201	heparin binding	8.27519	1.11e-07	1.97e-05
Arachnoid Barrier cells	increased	GO:0005539	glycosaminoglycan binding	7.27853	4.57e-08	9.76e-06
Arachnoid Barrier cells	increased	GO:1901681	sulfur compound binding	5.8336	5.55e-07	8.47e-05
Arachnoid Barrier cells	increased	mmu04974	Protein digestion and absorption	5.64597	0.000501074	0.0460988
Arachnoid Barrier cells	increased	mmu04350	TGF-beta signaling pathway	5.61129	0.000214458	0.0295952
Arachnoid Barrier cells	increased	GO:0061134	peptidase regulator activity	4.58807	0.000612112	0.0384911
Arachnoid Barrier cells	increased	GO:0003729	mRNA binding	4.23573	0.00049981	0.0333936
Arachnoid Barrier cells	increased	GO:0050839	cell adhesion molecule binding	3.40728	2.15e-05	0.00262644
Arachnoid Barrier cells	increased	GO:0005509	calcium ion binding	2.92491	0.000134638	0.0110714
Cell Type	Direction	Annotation	Pathway	OR	p-value	Adjusted p-value
Astrocytes	increased	GO:0004623	phospholipase A2 activity	21.7067	0.000608825	0.0295834
Astrocytes	increased	GO:0022829	wide pore channel activity	21.7067	0.000608825	0.0295834
Astrocytes	increased	GO:0005234	extracellular-glutamate-gated ion channel activity	20.1549	0.000733497	0.0326712
Astrocytes	increased	GO:0005343	organic acid:sodium symporter activity	18.81	0.000873305	0.0335065
Astrocytes	increased	GO:0004970	ionotropic glutamate receptor activity	18.81	0.000873305	0.0335065
Astrocytes	increased	mmu04964	Proximal tubule bicarbonate reclamation	17.9753	0.000165541	0.0456894
Astrocytes	increased	GO:0022835	transmitter-gated channel activity	17.1995	0.00015747	0.0133939
Astrocytes	increased	GO:0022824	transmitter-gated ion channel activity	17.1995	0.00015747	0.0133939
Astrocytes	increased	GO:0015296	anion:cation symporter activity	16.5949	0.00120104	0.0398824
Astrocytes	increased	GO:0015370	solute:sodium symporter activity	11.8168	0.000570901	0.0295834
Astrocytes	increased	GO:0005496	steroid binding	10.6221	4.26e-05	0.00650862
Astrocytes	increased	GO:0015171	amino acid transmembrane transporter activity	9.71867	6.73e-05	0.00799208
Astrocytes	increased	GO:0015294	solute:cation symporter activity	9.71867	6.73e-05	0.00799208
Astrocytes	increased	GO:0030594	neurotransmitter receptor activity	9.44843	0.00123117	0.0398824
Astrocytes	increased	GO:0015081	sodium ion transmembrane transporter activity	8.88454	8.01e-06	0.00285576
Astrocytes	increased	GO:0015293	symporter activity	7.64586	2.21e-05	0.00471883
Astrocytes	increased	GO:0022853	active ion transmembrane transporter activity	7.08294	0.00103796	0.0374928
Astrocytes	increased	GO:0046943	carboxylic acid transmembrane transporter activity	6.98198	0.000360633	0.0240948
Astrocytes	increased	GO:0005342	organic acid transmembrane transporter activity	6.81483	0.000407116	0.0256004
Astrocytes	increased	GO:0008509	anion transmembrane transporter activity	6.71314	1.85e-05	0.00471883
Astrocytes	increased	GO:0004866	endopeptidase inhibitor activity	6.21891	0.000641662	0.0298234
Astrocytes	increased	GO:0030414	peptidase inhibitor activity	5.89638	0.000834265	0.0335065
Astrocytes	increased	GO:0061135	endopeptidase regulator activity	5.83582	0.000877626	0.0335065
Astrocytes	increased	GO:0015291	secondary active transmembrane transporter activity	5.03003	0.000150826	0.0133939
Astrocytes	increased	GO:0022803	passive transmembrane transporter activity	4.7146	2.84e-06	0.00152038
Astrocytes	increased	GO:0015267	channel activity	4.7146	2.84e-06	0.00152038
Astrocytes	increased	GO:0001664	G-protein coincreasedled receptor binding	4.52648	0.000316325	0.0225434
Astrocytes	increased	GO:0005539	glycosaminoglycan binding	4.46115	0.00150833	0.0474237
Astrocytes	increased	GO:0022838	substrate-specific channel activity	4.30882	2.94e-05	0.00524213
Astrocytes	increased	GO:1901681	sulfur compound binding	4.17363	0.00108726	0.0374928
Astrocytes	increased	GO:0022804	active transmembrane transporter activity	3.96499	0.000223412	0.0170591
Astrocytes	increased	GO:0015077	monovalent inorganic cation transmembrane transporter activity	3.87268	0.000495753	0.0278926
Astrocytes	increased	GO:0046873	metal ion transmembrane transporter activity	3.83249	0.000162882	0.0133939
Astrocytes	increased	GO:0005216	ion channel activity	3.64806	0.000436661	0.0259328
Astrocytes	increased	GO:0022890	inorganic cation transmembrane transporter activity	3.07069	0.00105871	0.0374928
Astrocytes	decreased	GO:0003735	structural constituent of ribosome	160.628	3.03e-100	3.24e-97
Astrocytes	decreased	GO:0019843	rRNA binding	89.9232	5.84e-12	2.08e-09
Astrocytes	decreased	GO:0005198	structural molecule activity	55.9157	9.98e-77	5.34e-74
Astrocytes	decreased	GO:0003729	mRNA binding	12.4658	3.68e-10	9.84e-08
Astrocytes	decreased	GO:004432	ion channel binding	7.8751	0.000192543	0.0411658
Cell Type	Direction	Annotation	Pathway	OR	p-value	Adjusted p-value
Basket/Stellate Cells	increased	GO:0005509	calcium ion binding	46.6	3.64e-06	0.00129687
Basket/Stellate Cells	increased	GO:0019905	syntaxin binding	35.6909	1.18e-08	2.51e-06
Basket/Stellate Cells	increased	GO:0050998	nitric-oxide synthase binding	30.4575	2.77e-07	4.22e-05
Basket/Stellate Cells	increased	GO:0016675	oxidoreductase activity, acting on a heme groincreased of donors	25.2699	5.85e-06	0.000260756
Basket/Stellate Cells	increased	GO:0016676	oxidoreductase activity, acting on a heme groincreased of donors, oxygen as acceptor	23.7904	6.39e-05	0.00213433
Basket/Stellate Cells	increased	GO:0050780	dopamine receptor binding	23.7904	6.39e-05	0.00213433
Basket/Stellate Cells	increased	GO:0016247	channel regulator activity	20.831	1.67e-06	0.000119126
Basket/Stellate Cells	increased	GO:0031420	alkali metal ion binding	20.831	1.67e-06	0.000119126
Basket/Stellate Cells	increased	GO:0022890	inorganic cation transmembrane transporter activity	20.831	1.67e-06	0.000119126
Basket/Stellate Cells	increased	GO:0008324	cation transmembrane transporter activity	20.761	6.87e-05	0.0183492
Basket/Stellate Cells	increased	GO:0046873	metal ion transmembrane transporter activity	19.7881	2.15e-06	0.000131486
Basket/Stellate Cells	increased	GO:0022853	active ion transmembrane transporter activity	16.3504	0.000213531	0.00652185
Basket/Stellate Cells	increased	GO:0017080	sodium channel regulator activity	16.2408	2.66e-08	4.73e-06
Basket/Stellate Cells	increased	GO:0017075	syntaxin-1 binding	15.0974	4.14e-08	4.42e-05
Basket/Stellate Cells	increased	GO:0009055	electron carrier activity	14.5484	3.49e-09	3.21e-07
Basket/Stellate Cells	increased	GO:0035254	glutamate receptor binding	13.9556	0.00205272	0.0430265
Basket/Stellate Cells	increased	GO:0035255	ionotropic glutamate receptor binding	13.6413	9.43e-08	5.04e-05
Basket/Stellate Cells	increased	GO:0015662	ATPase activity, coincreasedled to transmembrane movement of ions, phosphorylative mechanism	13.0243	0.00243563	0.0491262
Basket/Stellate Cells	increased	GO:0015002	heme-copper terminal oxidase activity	13.0243	0.00243563	0.0491262
Basket/Stellate Cells	increased	GO:0019829	cation-transporting ATPase activity	12.5973	3.76e-10	1e-07
Basket/Stellate Cells	increased	GO:0047485	protein N-terminus binding	12.4533	0.000525033	0.0143913
Basket/Stellate Cells	increased	GO:0022803	passive transmembrane transporter activity	12.4364	0.00298228	0.027437
Basket/Stellate Cells	increased	GO:0005230	extracellular ligand-gated ion channel activity	11.8865	0.000613099	0.0156048
Basket/Stellate Cells	increased	GO:0005234	extracellular-glutamate-gated ion channel activity	11.8865	0.000613099	0.0156048
Basket/Stellate Cells	increased	GO:0005244	voltage-gated ion channel activity	11.8865	0.000613099	0.0156048
Basket/Stellate Cells	increased	GO:0005248	voltage-gated sodium channel activity	11.8688	3.26e-05	0.000642302
Basket/Stellate Cells	increased	GO:0015267	channel activity	11.3689	0.000711152	0.0176796
Basket/Stellate Cells	increased	GO:0005216	ion channel activity	10.4848	1.05e-10	1.45e-08
Basket/Stellate Cells	increased	GO:0004129	cytochrome-c oxidase activity	10.1834	2.34e-08	1.29e-06
Basket/Stellate Cells	increased	GO:0015079	potassium ion transmembrane transporter activity	10.099	0.00495455	0.0441114
Basket/Stellate Cells	increased	GO:0015078	hydrogen ion transmembrane transporter activity	10.0765	3.46e-07	1.36e-05
Basket/Stellate Cells	increased	GO:0015077	monovalent inorganic cation transmembrane transporter activity	10.0551	0.00107132	0.0243668
Basket/Stellate Cells	increased	GO:0005272	sodium channel activity	9.84534	1.53e-06	5.27e-05
Basket/Stellate Cells	increased	GO:0022843	voltage-gated cation channel activity	9.6578	1.76e-06	5.4e-05
Basket/Stellate Cells	increased	GO:0042625	ATPase coincreasedled ion transmembrane transporter activity	9.33562	0.00137254	0.0299437
Basket/Stellate Cells	increased	GO:0022835	transmitter-gated channel activity	9.30316	2.32e-06	6.4e-05
Basket/Stellate Cells	increased	GO:0022836	gated channel activity	9.244	3.66e-12	1.01e-09
Basket/Stellate Cells	increased	GO:0022838	substrate-specific channel activity	8.69024	0	0
Basket/Stellate Cells	increased	GO:0022832	voltage-gated channel activity	8.26162	4.79e-05	0.00170845
Basket/Stellate Cells	increased	GO:0015081	sodium ion transmembrane transporter activity	8.05407	0.000722067	0.00949003
Basket/Stellate Cells	increased	GO:0022824	transmitter-gated ion channel activity	7.99179	5.36e-06	0.000249018
Basket/Stellate Cells	increased	GO:0005261	cation channel activity	7.86494	1.88e-06	0.00012573
Basket/Stellate Cells	increased	GO:0044325	ion channel binding	7.77632	3.83e-08	1.76e-06
Basket/Stellate Cells	increased	GO:1905030	voltage-gated ion channel activity involved in regulation of postsynaptic membrane potential	7.58189	7.87e-05	0.00255077
Basket/Stellate Cells	increased	GO:0008022	protein C-terminus binding	7.43161	4.09e-06	9.41e-05
Basket/Stellate Cells	increased	GO:0030165	PDZ domain binding	7.2846	0.00097209	0.0230925
Basket/Stellate Cells	increased	GO:0008066	glutamate receptor activity	7.12576	0.0010645	0.0243668
Basket/Stellate Cells	increased	GO:0001664	G-protein coincreasedled receptor binding	6.97368	0.00116326	0.0259068
Basket/Stellate Cells	increased	GO:0016917	GABA receptor activity	6.95861	5.12e-06	0.000248921
Basket/Stellate Cells	increased	GO:0048306	calcium-dependent protein binding	6.4712	0	0
Basket/Stellate Cells	increased	GO:0015631	tubulin binding	6.42643	2.2e-08	1.29e-06
Basket/Stellate Cells	increased	GO:0000149	SNARE binding	6.29791	1.15e-05	0.00049098
Basket/Stellate Cells	increased	GO:0004970	ionotropic glutamate receptor activity	6.12334	1.44e-05	0.000591643
Basket/Stellate Cells	increased	mmu00190	Oxidative phosphorylation	5.97797	0.000810248	0.0196853
Basket/Stellate Cells	increased	mmu04114	Oocyte meiosis	5.81238	0.00268977	0.027437
Basket/Stellate Cells	increased	mmu04910	Insulin signaling pathway	5.80443	0.00042105	0.0064561
Basket/Stellate Cells	increased	mmu04911	Insulin secretion	5.74839	1.33e-05	0.000281567
Basket/Stellate Cells	increased	mmu04270	Vascular smooth muscle contraction	5.49706	0	0
Basket/Stellate Cells	increased	mmu04713	Circadian entrainment	5.46016	0.000207714	0.00652185
Basket/Stellate Cells	increased	mmu04961	Endocrine and other factor-regulated calcium reabsorption	5.34914	0.000236564	0.00702463
Basket/Stellate Cells	increased	mmu05016	Huntington's disease	5.25025	2.84e-06	7.12e-05
Basket/Stellate Cells	increased	mmu04723	Retrograde endocannabinoid signaling	5.20349	0.000336773	0.00546761
Basket/Stellate Cells	increased	mmu04964	Proximal tubule bicarbonate reclamation	5.14002	0.00030414	0.00855594
Basket/Stellate Cells	increased	mmu04721	Synaptic vesicle cycle	5.04421	5.74e-07	6.82e-05
Basket/Stellate Cells	increased	mmu04720	Long-term potentiation	5.00341	4.29e-05	0.000788925
Basket/Stellate Cells	increased	mmu05012	Parkinson's disease	4.97568	0.000976281	0.0117154
Basket/Stellate Cells	increased	mmu05010	Alzheimer's disease	4.91178	0.0010467	0.012037
Basket/Stellate Cells	increased	mmu04922	Glucagon signaling pathway	4.70263	0.000626228	0.00864194
Basket/Stellate Cells	increased	mmu04932	Non-alcoholic fatty liver disease (NAFLD)	4.57127	3.3e-05	0.0013074
Basket/Stellate Cells	increased	mmu04024	cAMP signaling pathway	4.4639	0.000215637	0.00371973
Basket/Stellate Cells	increased	mmu04260	Cardiac muscle contraction	4.36324	4.54e-07	6.07e-05
Basket/Stellate Cells	increased	mmu04022	cGMP-PKG signaling pathway	4.30519	1.05e-06	0.000108787
Basket/Stellate Cells	increased	mmu04020	Calcium signaling pathway	4.25456	0.00224454	0.0238267
Basket/Stellate Cells	increased	mmu04261	Adrenergic signaling in cardiomyocytes	4.215	1.39e-06	0.000119126
Basket/Stellate Cells	increased	mmu04750	Inflammatory mediator regulation of TRP channels	4.15972	4.02e-05	0.00153553
Basket/Stellate Cells	increased	mmu04727	GABAergic synapse	4.03951	0.000449442	0.00652874
Basket/Stellate Cells	increased	mmu04724	Glutamatergic synapse	4.02921	0.00297911	0.027437
Basket/Stellate Cells	increased	mmu04728	Dopaminergic synapse	3.91382	3.66e-06	0.000186518
Basket/Stellate Cells	increased	mmu04971	Gastric acid secretion	3.91382	3.66e-06	0.000186518
Basket/Stellate Cells	increased	mmu04970	Salivary secretion	3.86043	0.000273489	0.00790161
Basket/Stellate Cells	increased	mmu00010	Glycolysis / Gluconeogenesis	3.64344	0.00282483	0.027437
Basket/Stellate Cells	increased	mmu04744	Phototransduction	3.62385	0.00167822	0.0185275
Basket/Stellate Cells	increased	mmu05033	Nicotine addiction	3.52342	1.12e-06	0.000108787
Basket/Stellate Cells	increased	mmu05031	Amphetamine addiction	3.02027	0.00182445	0.0390068
Basket/Stellate Cells	decreased	GO:0042277	peptide binding	6.06675	2.34e-06	0.000131486
Basket/Stellate Cells	decreased	GO:0001540	beta-amyloid binding	6.06675	2.34e-06	0.000131486
Basket/Stellate Cells	decreased	GO:0005496	steroid binding	6.01224	0.000894212	0.0112183
Basket/Stellate Cells	decreased	GO:0033218	amide binding	5.98379	4.46e-05	0.00164305
Cell Type	Direction	Annotation	Pathway	OR	p-value	Adjusted p-value
Cerebellar Granule Neurons	increased	GO:0005509	calcium ion binding	93.4444	1.03e-11	2.74e-09
Cerebellar Granule Neurons	increased	GO:0019905	syntaxin binding	93.4444	1.03e-11	2.74e-09
Cerebellar Granule Neurons	increased	GO:0005516	calmodulin binding	93.4444	1.03e-11	2.74e-09
Cerebellar Granule Neurons	increased	GO:0050998	nitric-oxide synthase binding	88.5205	2.06e-11	3.67e-09
Cerebellar Granule Neurons	increased	GO:0016675	oxidoreductase activity, acting on a heme groincreased of donors	83.1978	1.96e-08	2.1e-06
Cerebellar Granule Neurons	increased	GO:0016676	oxidoreductase activity, acting on a heme groincreased of donors, oxygen as acceptor	56.5075	4.07e-05	0.00255923
Cerebellar Granule Neurons	increased	GO:0016247	channel regulator activity	56.5075	4.07e-05	0.00255923
Cerebellar Granule Neurons	increased	GO:0022890	inorganic cation transmembrane transporter activity	41.2623	1.67e-12	1.79e-09
Cerebellar Granule Neurons	increased	GO:0008324	cation transmembrane transporter activity	39.8745	0.000100302	0.00510587
Cerebellar Granule Neurons	increased	GO:0046873	metal ion transmembrane transporter activity	38.5385	0.000131786	0.00178906
Cerebellar Granule Neurons	increased	GO:0043548	phosphatidylinositol 3-kinase binding	29.4927	2.02e-05	0.00709071
Cerebellar Granule Neurons	increased	GO:0017075	syntaxin-1 binding	28.2313	0.000251487	0.01034
Cerebellar Granule Neurons	increased	GO:0001786	phosphatidylserine binding	27.5374	4.19e-08	5.78e-06
Cerebellar Granule Neurons	increased	GO:0009055	electron carrier activity	27.4954	2.48e-08	2.41e-06
Cerebellar Granule Neurons	increased	GO:0035254	glutamate receptor binding	26.0563	0.000312103	0.012357
Cerebellar Granule Neurons	increased	GO:0015002	heme-copper terminal oxidase activity	25.9458	3.99e-09	4.74e-07
Cerebellar Granule Neurons	increased	GO:0047485	protein N-terminus binding	24.0019	9.82e-08	9.04e-06
Cerebellar Granule Neurons	increased	GO:0022803	passive transmembrane transporter activity	23.3562	0.000419491	0.0160156
Cerebellar Granule Neurons	increased	GO:0005244	voltage-gated ion channel activity	20.5197	0.000595972	0.0199092
Cerebellar Granule Neurons	increased	GO:0005246	calcium channel regulator activity	19.8873	2.05e-06	0.00011298
Cerebellar Granule Neurons	increased	GO:0005248	voltage-gated sodium channel activity	19.0556	0.000114627	0.00169188
Cerebellar Granule Neurons	increased	GO:0015267	channel activity	18.1226	2.33e-06	0.00019132
Cerebellar Granule Neurons	increased	GO:0005216	ion channel activity	17.9115	3.58e-06	0.000164555
Cerebellar Granule Neurons	increased	GO:0004129	cytochrome-c oxidase activity	16.2896	5.93e-06	0.000233967
Cerebellar Granule Neurons	increased	GO:0015078	hydrogen ion transmembrane transporter activity	16.2077	2.09e-09	5.77e-07
Cerebellar Granule Neurons	increased	GO:0015077	monovalent inorganic cation transmembrane transporter activity	15.7488	3.91e-05	0.000770437
Cerebellar Granule Neurons	increased	GO:0005272	sodium channel activity	15.7372	0.00122612	0.0374492
Cerebellar Granule Neurons	increased	GO:0022836	gated channel activity	15.3409	3.23e-07	2.23e-05
Cerebellar Granule Neurons	increased	GO:0022838	substrate-specific channel activity	15.1524	2.02e-11	3.67e-09
Cerebellar Granule Neurons	increased	GO:0022832	voltage-gated channel activity	14.9399	4.94e-05	0.000851969
Cerebellar Granule Neurons	increased	GO:0015081	sodium ion transmembrane transporter activity	13.8586	0.00194162	0.0167465
Cerebellar Granule Neurons	increased	GO:0005261	cation channel activity	13.7012	1.06e-05	0.000808777
Cerebellar Granule Neurons	increased	GO:0044325	ion channel binding	13.4395	1.65e-05	0.000505728
Cerebellar Granule Neurons	increased	GO:1905030	voltage-gated ion channel activity involved in regulation of postsynaptic membrane potential	12.9959	5.87e-07	5.23e-05
Cerebellar Granule Neurons	increased	GO:0048306	calcium-dependent protein binding	12.9669	1.15e-09	1.23e-06
Cerebellar Granule Neurons	increased	GO:0000149	SNARE binding	12.9033	0.000458113	0.00483225
Cerebellar Granule Neurons	increased	mmu00190	Oxidative phosphorylation	11.5117	2.65e-05	0.00709071
Cerebellar Granule Neurons	increased	mmu04114	Oocyte meiosis	11.4661	0.000125668	0.00609199
Cerebellar Granule Neurons	increased	mmu04912	GnRH signaling pathway	11.4549	9.61e-06	0.000331434
Cerebellar Granule Neurons	increased	mmu04911	Insulin secretion	11.1897	4.33e-05	0.000797401
Cerebellar Granule Neurons	increased	mmu04916	Melanogenesis	10.9758	0.000192647	0.00241685
Cerebellar Granule Neurons	increased	mmu04915	Estrogen signaling pathway	10.9216	0.000156137	0.00667644
Cerebellar Granule Neurons	increased	mmu05214	Glioma	10.8383	0.000203587	0.00244305
Cerebellar Granule Neurons	increased	mmu04921	Oxytocin signaling pathway	10.6913	2.58e-10	3.94e-08
Cerebellar Granule Neurons	increased	mmu04270	Vascular smooth muscle contraction	10.3207	0.000252167	0.00278392
Cerebellar Granule Neurons	increased	mmu04713	Circadian entrainment	10.0333	0.000951772	0.0299248
Cerebellar Granule Neurons	increased	mmu05016	Huntington's disease	10.0154	2.17e-05	0.000599791
Cerebellar Granule Neurons	increased	mmu04723	Retrograde endocannabinoid signaling	9.73929	0.00123399	0.0109865
Cerebellar Granule Neurons	increased	mmu04722	Neurotrophin signaling pathway	9.56288	2.87e-05	0.000720666
Cerebellar Granule Neurons	increased	mmu04721	Synaptic vesicle cycle	9.40696	0.000107101	0.00169188
Cerebellar Granule Neurons	increased	mmu04720	Long-term potentiation	9.35128	3.29e-05	0.000755753
Cerebellar Granule Neurons	increased	mmu05012	Parkinson's disease	9.21521	3.59e-05	0.000761773
Cerebellar Granule Neurons	increased	mmu05010	Alzheimer's disease	9.14289	1.69e-09	2.26e-07
Cerebellar Granule Neurons	increased	mmu04925	Aldosterone synthesis and secretion	8.93022	0.00047272	0.00483225
Cerebellar Granule Neurons	increased	mmu04924	Renin secretion	8.25055	0.000538053	0.0191036
Cerebellar Granule Neurons	increased	mmu04922	Glucagon signaling pathway	8.25055	0.000538053	0.0191036
Cerebellar Granule Neurons	increased	mmu04932	Non-alcoholic fatty liver disease (NAFLD)	8.23359	0.000212531	0.0024441
Cerebellar Granule Neurons	increased	mmu04024	cAMP signaling pathway	7.72338	0.000880926	0.00810452
Cerebellar Granule Neurons	increased	mmu04260	Cardiac muscle contraction	7.72159	0.00275855	0.0217531
Cerebellar Granule Neurons	increased	mmu04022	cGMP-PKG signaling pathway	7.55616	0.00011647	0.00169188
Cerebellar Granule Neurons	increased	mmu04020	Calcium signaling pathway	7.54722	0.0029831	0.0228704
Cerebellar Granule Neurons	increased	mmu04261	Adrenergic signaling in cardiomyocytes	7.37333	9.24e-05	0.00493691
Cerebellar Granule Neurons	increased	mmu04750	Inflammatory mediator regulation of TRP channels	7.22074	0.00346928	0.025879
Cerebellar Granule Neurons	increased	mmu04514	Cell adhesion molecules (CAMs)	6.84975	0.00414985	0.030141
Cerebellar Granule Neurons	increased	mmu04725	Cholinergic synapse	6.49576	0.000701006	0.00667165
Cerebellar Granule Neurons	increased	mmu04724	Glutamatergic synapse	6.47777	7.42e-05	0.0044094
Cerebellar Granule Neurons	increased	mmu04728	Dopaminergic synapse	6.45406	0.000553987	0.0191036
Cerebellar Granule Neurons	increased	mmu04971	Gastric acid secretion	6.34651	8.51e-05	0.00478755
Cerebellar Granule Neurons	increased	mmu04970	Salivary secretion	6.20276	0.00221141	0.0184955
Cerebellar Granule Neurons	increased	mmu04740	Olfactory transduction	6.04018	0.00633142	0.044807
Cerebellar Granule Neurons	increased	mmu04744	Phototransduction	5.98331	0.00256551	0.0208259
Cerebellar Granule Neurons	increased	mmu04742	Taste transduction	5.90681	0.000136771	0.00609199
Cerebellar Granule Neurons	increased	mmu05034	Alcoholism	5.90681	0.000136771	0.00609199
Cerebellar Granule Neurons	increased	mmu05031	Amphetamine addiction	5.30368	0.000630358	0.0204198
Cerebellar Granule Neurons	increased	mmu05152	Tuberculosis	4.05858	0.00146476	0.0434953
Cerebellar Granule Neurons	decreased	GO:0001948	glycoprotein binding	12.8233	1.51e-05	0.00107853
Cerebellar Granule Neurons	decreased	GO:0042277	peptide binding	11.8788	0.000136124	0.00178906
Cerebellar Granule Neurons	decreased	GO:0001540	beta-amyloid binding	11.6984	3.53e-09	1.88e-06
Cerebellar Granule Neurons	decreased	GO:0033218	amide binding	11.5784	0.000671996	0.00662396
Cell Type	Direction	Annotation	Pathway	OR	p-value	Adjusted p-value
Endothelial Cells	increased	GO:0050998	nitric-oxide synthase binding	20.9631	4.9e-11	1.75e-08
Endothelial Cells	increased	GO:0046915	transition metal ion transmembrane transporter activity	20.3873	7.46e-05	0.0366568
Endothelial Cells	increased	GO:0005342	organic acid transmembrane transporter activity	17.0943	4.54e-11	1.75e-08
Endothelial Cells	increased	GO:0015175	neutral amino acid transmembrane transporter activity	17.0099	0.000145657	0.0389269
Endothelial Cells	increased	GO:0008134	transcription factor binding	12.3377	0.000600918	0.0401488
Endothelial Cells	increased	GO:0003729	mRNA binding	10.5337	0	0
Endothelial Cells	increased	GO:0003735	structural constituent of ribosome	9.51572	0.000351014	0.0250156
Endothelial Cells	increased	GO:0019838	growth factor binding	9.29832	2.74e-05	0.0293016
Endothelial Cells	increased	GO:0045296	cadherin binding	7.97824	0.000717476	0.0451166
Endothelial Cells	increased	GO:0019843">GO:0019843</a>	rRNA binding	7.85995	2.3e-09	6.15e-07
Endothelial Cells	increased	GO:0005200	structural constituent of cytoskeleton	7.73876	7.62e-05	0.00663233
Endothelial Cells	increased	GO:0098631	protein binding involved in cell adhesion	7.47374	0.000102872	0.0366568
Endothelial Cells	increased	GO:0098632	protein binding involved in cell-cell adhesion	5.69275	6.76e-05	0.00656712
Endothelial Cells	increased	GO:0098641	cadherin binding involved in cell-cell adhesion	5.55144	8.07e-05	0.00663233
Endothelial Cells	increased	GO:0005198	structural molecule activity	3.99805	4.54e-07	8.09e-05
Endothelial Cells	increased	GO:0046943	carboxylic acid transmembrane transporter activity	3.99216	0.000113669	0.00867945
Endothelial Cells	increased	GO:0050839	cell adhesion molecule binding	3.97369	4.8e-09	1.03e-06
Endothelial Cells	decreased	GO:0022890	inorganic cation transmembrane transporter activity	3.85338	2.48e-06	0.000379475
Endothelial Cells	decreased	GO:0046873	metal ion transmembrane transporter activity	3.76223	3.43e-06	0.000458057
Endothelial Cells	decreased	GO:0015081	sodium ion transmembrane transporter activity	3.70378	4.23e-06	0.000501884
Endothelial Cells	decreased	GO:0051117	ATPase binding	2.68131	4.44e-05	0.00474617
Cell Type	Direction	Annotation	Pathway	OR	p-value	Adjusted p-value
Ependymal Ciliated Cells	increased	GO:0005509	calcium ion binding	111.699	0.000223049	0.0264933
Ependymal Ciliated Cells	increased	GO:0023026	MHC class II protein complex binding	101.645	7.24e-06	0.00203949
Ependymal Ciliated Cells	increased	GO:0045296	cadherin binding	101.645	7.24e-06	0.00203949
Ependymal Ciliated Cells	increased	GO:0098631	protein binding involved in cell adhesion	98.1336	7.99e-06	0.00203949
Ependymal Ciliated Cells	increased	GO:0098632	protein binding involved in cell-cell adhesion	83.6746	1.25e-05	0.00203949
Ependymal Ciliated Cells	increased	GO:0098641	cadherin binding involved in cell-cell adhesion	77.6675	0.00043508	0.035777
Ependymal Ciliated Cells	increased	GO:0051087	chaperone binding	77.6675	0.00043508	0.035777
Ependymal Ciliated Cells	increased	GO:0051082	unfolded protein binding	77.6675	0.00043508	0.035777
Ependymal Ciliated Cells	increased	GO:0050839	cell adhesion molecule binding	74.4265	0.000470986	0.0359632
Ependymal Ciliated Cells	increased	GO:0015631	tubulin binding	59.5176	0.000715596	0.0478108
Ependymal Ciliated Cells	increased	GO:0023023	MHC protein complex binding	42.3694	8.55e-05	0.0114301
Ependymal Ciliated Cells	increased	mmu04910	Insulin signaling pathway	5.02946	0.000950593	0.0238513
Ependymal Ciliated Cells	increased	mmu04918	Thyroid hormone synthesis	4.90759	0.000229	0.0158
Ependymal Ciliated Cells	increased	mmu04915	Estrogen signaling pathway	4.22867	2.53e-05	0.00232615
Ependymal Ciliated Cells	increased	mmu04722	Neurotrophin signaling pathway	3.64054	0.000541	0.02
Ependymal Ciliated Cells	increased	mmu05133	Pertussis	3.46491	0.000289297	0.0159692
Ependymal Ciliated Cells	increased	mmu04922	Glucagon signaling pathway	3.45182	0.00135095	0.0310719
Ependymal Ciliated Cells	increased	mmu04024	cAMP signaling pathway	3.40068	0.00248788	0.0490467
Ependymal Ciliated Cells	increased	mmu04141	Protein processing in endoplasmic reticulum	3.24662	6.03e-05	0.0121802
Ependymal Ciliated Cells	increased	mmu04261	Adrenergic signaling in cardiomyocytes	3.21278	4.27e-05	0.0121802
Ependymal Ciliated Cells	increased	mmu04971	Gastric acid secretion	3.13707	5.68e-05	0.0121802
Ependymal Ciliated Cells	increased	mmu04970	Salivary secretion	3.08851	6.84e-05	0.0121802
Ependymal Ciliated Cells	increased	mmu04978	Mineral absorption	2.99934	1.11e-06	0.000593138
Ependymal Ciliated Cells	increased	mmu04744	Phototransduction	2.97334	0.000106779	0.0163067
Ependymal Ciliated Cells	increased	mmu05031	Amphetamine addiction	2.42491	0.00050397	0.0489767
Ependymal Ciliated Cells	decreased	GO:0016651	oxidoreductase activity, acting on NAD(P)H	24.3928	0.000411662	0.035777
Ependymal Ciliated Cells	decreased	GO:0016655	oxidoreductase activity, acting on NAD(P)H, quinone or similar compound as acceptor	20.9412	1.34e-05	0.00203949
Ependymal Ciliated Cells	decreased	GO:0016675	oxidoreductase activity, acting on a heme groincreased of donors	17.7214	5.72e-06	0.00203949
Ependymal Ciliated Cells	decreased	GO:0016676	oxidoreductase activity, acting on a heme groincreased of donors, oxygen as acceptor	16.0011	0.000280609	0.0333301
Ependymal Ciliated Cells	decreased	GO:0031420	alkali metal ion binding	15.205	1.33e-05	0.00203949
Ependymal Ciliated Cells	decreased	GO:0050136a>	NADH dehydrogenase (quinone) activity	14.6667	0.000367551	0.0392912
Ependymal Ciliated Cells	decreased	GO:0022890	inorganic cation transmembrane transporter activity	13.4577	0.000524279	0.0199652
Ependymal Ciliated Cells	decreased	GO:0008324	cation transmembrane transporter activity	12.648	0.000564673	0.0402424
Ependymal Ciliated Cells	decreased	GO:0046873	metal ion transmembrane transporter activity	9.47897	1.36e-07	0.000145028
Ependymal Ciliated Cells	decreased	GO:0008137	NADH dehydrogenase (ubiquinone) activity	7.20483	1.6e-05	0.00220196
Ependymal Ciliated Cells	decreased	GO:0003954	NADH dehydrogenase activity	6.35952	2.25e-06	0.000620517
Ependymal Ciliated Cells	decreased	GO:0015662	ATPase activity, coincreasedled to transmembrane movement of ions, phosphorylative mechanism	6.33224	0.00201505	0.0427811
Ependymal Ciliated Cells	decreased	GO:0015002	heme-copper terminal oxidase activity	6.01847	0.000122783	0.0164069
Ependymal Ciliated Cells	decreased	GO:0004129	cytochrome-c oxidase activity	5.5182	0.000578701	0.0199652
Ependymal Ciliated Cells	decreased	GO:0015079	potassium ion transmembrane transporter activity	5.31185	0.000710159	0.0217782
Ependymal Ciliated Cells	decreased	GO:0015077	monovalent inorganic cation transmembrane transporter activity	5.02946	0.000951	0.0238513
Cell Type	Direction	Annotation	Pathway	OR	p-value	Adjusted p-value
Ependymal Secretory Cells	increased	GO:0016887	ATPase activity	39.4286	6.8e-12	1.04e-09
Ependymal Secretory Cells	increased	GO:0016651	oxidoreductase activity, acting on NAD(P)H	39.4286	6.8e-12	1.04e-09
Ependymal Secretory Cells	increased	GO:0016655	oxidoreductase activity, acting on NAD(P)H, quinone or similar compound as acceptor	39.4286	6.8e-12	1.04e-09
Ependymal Secretory Cells	increased	GO:1901681	sulfur compound binding	37.3896	1.53e-10	9.1e-09
Ependymal Secretory Cells	increased	GO:0016675	oxidoreductase activity, acting on a heme groincreased of donors	36.7975	2e-11	1.54e-09
Ependymal Secretory Cells	increased	GO:0016676	oxidoreductase activity, acting on a heme groincreased of donors, oxygen as acceptor	31.9943	1.97e-11	1.54e-09
Ependymal Secretory Cells	increased	GO:0015399	primary active transmembrane transporter activity	27.5889	2.01e-11	1.54e-09
Ependymal Secretory Cells	increased	GO:0050136	NADH dehydrogenase (quinone) activity	27.5889	2.01e-11	1.54e-09
Ependymal Secretory Cells	increased	GO:0022890	inorganic cation transmembrane transporter activity	26.2734	3.9e-11	2.78e-09
Ependymal Secretory Cells	increased	GO:0008324	cation transmembrane transporter activity	26.0101	0	0
Ependymal Secretory Cells	increased	GO:0046873	metal ion transmembrane transporter activity	24.6788	9.87e-07	4.06e-05
Ependymal Secretory Cells	increased	GO:0022853	active ion transmembrane transporter activity	21.6599	2.4e-07	1.03e-05
Ependymal Secretory Cells	increased	GO:0008144	drug binding	21.2137	1.12e-10	7.05e-09
Ependymal Secretory Cells	increased	GO:0008137	NADH dehydrogenase (ubiquinone) activity	18.3408	2.51e-12	1.38e-10
Ependymal Secretory Cells	increased	GO:0003954	NADH dehydrogenase activity	17.8313	0.00018792	0.00608748
Ependymal Secretory Cells	increased	GO:0036442	hydrogen-exporting ATPase activity	17.256	5.96e-12	1.04e-09
Ependymal Secretory Cells	increased	GO:0016836	hydro-lyase activity	16.8124	6.06e-11	4.05e-09
Ependymal Secretory Cells	increased	GO:0004866	endopeptidase inhibitor activity	16.3443	0.000246585	0.00753141
Ependymal Secretory Cells	increased	GO:0009055	electron carrier activity	15.6649	1.45e-11	1.54e-09
Ependymal Secretory Cells	increased	GO:0016820	hydrolase activity, acting on acid anhydrides, catalyzing transmembrane movement of substances	14.5421	1.06e-11	1.26e-09
Ependymal Secretory Cells	increased	GO:0015405	P-P-bond-hydrolysis-driven transmembrane transporter activity	13.716	0	0
Ependymal Secretory Cells	increased	GO:0015662	ATPase activity, coincreasedled to transmembrane movement of ions, phosphorylative mechanism	11.8323	0	0
Ependymal Secretory Cells	increased	GO:0003682	chromatin binding	11.3782	6.64e-05	0.00203548
Ependymal Secretory Cells	increased	GO:0023026	MHC class II protein complex binding	9.97151	7.94e-13	2.83e-10
Ependymal Secretory Cells	increased	GO:0015002	heme-copper terminal oxidase activity	9.60784	0	0
Ependymal Secretory Cells	increased	GO:0019829	cation-transporting ATPase activity	9.32768	1.45e-07	6.47e-06
Ependymal Secretory Cells	increased	GO:0022804	active transmembrane transporter activity	9.2995	3.26e-09	1.74e-07
Ependymal Secretory Cells	increased	GO:0030414	peptidase inhibitor activity	9.17811	3.79e-09	1.93e-07
Ependymal Secretory Cells	increased	GO:0008509	anion transmembrane transporter activity	9.10097	0.000421627	0.011861
Ependymal Secretory Cells	increased	GO:0043531	ADP binding	8.83214	5.84e-09	2.71e-07
Ependymal Secretory Cells	increased	GO:0004129	cytochrome-c oxidase activity	8.83214	5.84e-09	2.71e-07
Ependymal Secretory Cells	increased	GO:0061134	peptidase regulator activity	8.77034	5.05e-10	2.32e-08
Ependymal Secretory Cells	increased	GO:0061135	endopeptidase regulator activity	8.7272	1.95e-09	1.1e-07
Ependymal Secretory Cells	increased	GO:0015078	hydrogen ion transmembrane transporter activity	8.47217	0.000563659	0.0150638
Ependymal Secretory Cells	increased	GO:0015077	monovalent inorganic cation transmembrane transporter activity	8.03916	0	0
Ependymal Secretory Cells	increased	GO:0042625	ATPase coincreasedled ion transmembrane transporter activity	7.33473	7.82e-12	1.04e-09
Ependymal Secretory Cells	increased	GO:0042626	ATPase activity, coincreasedled to transmembrane movement of substances	6.17193	0.000271465	0.00806099
Ependymal Secretory Cells	increased	GO:0042623	ATPase activity, coincreasedled	5.79644	5.51e-13	2.83e-10
Ependymal Secretory Cells	increased	GO:0015293	symporter activity	5.40779	4.08e-05	0.00155848
Ependymal Secretory Cells	increased	GO:0015291	secondary active transmembrane transporter activity	5.17985	0.00168415	0.0409172
Ependymal Secretory Cells	increased	GO:0043492	ATPase activity, coincreasedled to movement of substances	5.02305	7.21e-05	0.00265951
Ependymal Secretory Cells	increased	GO:0044769	ATPase activity, coincreasedled to transmembrane movement of ions, rotational mechanism	4.61565	0.000191517	0.00528587
Ependymal Secretory Cells	increased	GO:0051082	unfolded protein binding	4.49788	0.000937742	0.0215681
Ependymal Secretory Cells	increased	GO:0046961	proton-transporting ATPase activity, rotational mechanism	4.46873	0.000482497	0.0121063
Ependymal Secretory Cells	increased	GO:0023023	MHC protein complex binding	4.39348	0.000832538	0.0217069
Ependymal Secretory Cells	increased	mmu00190	Oxidative phosphorylation	4.37365	1.03e-05	0.000406727
Ependymal Secretory Cells	increased	mmu04918	Thyroid hormone synthesis	4.27951	0.0001219	0.00407223
Ependymal Secretory Cells	increased	mmu01200	Carbon metabolism	4.16084	0.00115333	0.0293551
Ependymal Secretory Cells	increased	mmu05016	Huntington's disease	4.11722	0.00122797	0.0305279
Ependymal Secretory Cells	increased	mmu04964	Proximal tubule bicarbonate reclamation	4.00357	0.000396134	0.0114451
Ependymal Secretory Cells	increased	mmu05012	Parkinson's disease	3.84589	8.63e-05	0.00301141
Ependymal Secretory Cells	increased	mmu05010	Alzheimer's disease	3.34972	3.82e-05	0.00131779
Ependymal Secretory Cells	increased	mmu04932	Non-alcoholic fatty liver disease (NAFLD)	3.31937	0.000546984	0.014993
Ependymal Secretory Cells	increased	mmu04260	Cardiac muscle contraction	3.05451	2.18e-05	0.000861377
Ependymal Secretory Cells	increased	mmu04141	Protein processing in endoplasmic reticulum	3.02441	8.73e-05	0.00301141
Ependymal Secretory Cells	increased	mmu00010	Glycolysis / Gluconeogenesis	3.01823	0.000208869	0.0065671
Ependymal Secretory Cells	increased	mmu01230	Biosynthesis of amino acids	0.104967	0.00180057	0.0427736
Cell Type	Direction	Annotation	Pathway	OR	p-value	Adjusted p-value
Microglia	increased	GO:0019955	cytokine binding	145.24	1.19e-11	1.06e-09
Microglia	increased	GO:0001948	glycoprotein binding	145.24	1.19e-11	1.06e-09
Microglia	increased	GO:0003735	structural constituent of ribosome	145.24	1.19e-11	1.06e-09
Microglia	increased	GO:0035586	purinergic receptor activity	134.857	2.09e-11	1.69e-09
Microglia	increased	GO:0016502	nucleotide receptor activity	132.299	0	0
Microglia	increased	GO:0004197	cysteine-type endopeptidase activity	132.299	0	0
Microglia	increased	GO:0004175	endopeptidase activity	124.941	2.21e-11	1.69e-09
Microglia	increased	GO:0008234	cysteine-type peptidase activity	97.7475	3.82e-12	6.81e-10
Microglia	increased	GO:0001614	purinergic nucleotide receptor activity	95.8555	1.17e-11	1.06e-09
Microglia	increased	GO:0008047	enzyme activator activity	49.0227	4.09e-06	0.00109356
Microglia	decreased	GO:0016887	ATPase activity	49.0227	4.09e-06	0.00109356
Microglia	decreased	GO:0005507	copper ion binding	45.846	0	0
Microglia	decreased	GO:0016651	oxidoreductase activity, acting on NAD(P)H	40.0585	5.89e-12	8.99e-10
Microglia	decreased	GO:0016655	oxidoreductase activity, acting on NAD(P)H, quinone or similar compound as acceptor	35.9405	1.13e-05	0.00242634
Microglia	decreased	GO:0050998	nitric-oxide synthase binding	34.1448	8.63e-08	5.13e-06
Microglia	decreased	GO:0016675	oxidoreductase activity, acting on a heme groincreased of donors	28.0465	2.44e-09	1.74e-07
Microglia	decreased	GO:0016676	oxidoreductase activity, acting on a heme groincreased of donors, oxygen as acceptor	27.4977	0	0
Microglia	decreased	GO:0015399	primary active transmembrane transporter activity	27.4073	2.85e-09	1.9e-07
Microglia	decreased	GO:0050136	NADH dehydrogenase (quinone) activity	25.3798	0.000362364	0.0124957
Microglia	decreased	GO:0022890	inorganic cation transmembrane transporter activity	23.9683	0.000420582	0.0140501
Microglia	decreased	GO:0008324	cation transmembrane transporter activity	21.5686	0.000554291	0.0179557
Microglia	decreased	GO:0022853	active ion transmembrane transporter activity	18.9431	7.94e-12	1.06e-09
Microglia	decreased	GO:0008137	NADH dehydrogenase (ubiquinone) activity	18.8175	4.05e-08	2.55e-06
Microglia	decreased	GO:0003954	NADH dehydrogenase activity	16.6662	6e-07	0.00064139
Microglia	decreased	GO:0036442	hydrogen-exporting ATPase activity	16.0789	5.08e-13	1.09e-10
Microglia	decreased	GO:0009055	electron carrier activity	14.6693	2.36e-07	1.33e-05
Microglia	decreased	GO:0016820	hydrolase activity, acting on acid anhydrides, catalyzing transmembrane movement of substances	14.4916	2.57e-07	1.38e-05
Microglia	decreased	GO:0015405	P-P-bond-hydrolysis-driven transmembrane transporter activity	13.9833	3.31e-07	1.61e-05
Microglia	decreased	GO:0035254	glutamate receptor binding	13.9833	3.31e-07	1.61e-05
Microglia	decreased	GO:0015662	ATPase activity, coincreasedled to transmembrane movement of ions, phosphorylative mechanism	13.8059	0.000310604	0.0114495
Microglia	decreased	GO:0015002	heme-copper terminal oxidase activity	13.4839	0.000337656	0.0120318
Microglia	decreased	GO:0019829	cation-transporting ATPase activity	12.7864	6.23e-07	2.89e-05
Microglia	decreased	GO:0047485	protein N-terminus binding	12.6046	8.29e-05	0.00354499
Microglia	decreased	GO:0022804	active transmembrane transporter activity	10.2031	1.22e-05	0.000544158
Microglia	decreased	GO:0004129	cytochrome-c oxidase activity	9.73657	0.000257745	0.0102048
Microglia	decreased	GO:0015078	hydrogen ion transmembrane transporter activity	9.03003	0.000358938	0.0383705
Microglia	decreased	GO:0015077	monovalent inorganic cation transmembrane transporter activity	8.41064	0.000137166	0.00563964
Microglia	decreased	GO:0042625	ATPase coincreasedled ion transmembrane transporter activity	8.35547	0.000141977	0.0252956
Microglia	decreased	GO:0042626	ATPase activity, coincreasedled to transmembrane movement of substances	7.73792	2.06e-06	0.00109356
Microglia	decreased	GO:0042623	ATPase activity, coincreasedled	6.27805	0.000221831	0.0296422
Microglia	decreased	GO:0051117	ATPase binding	4.69384	0.00025364	0.0301268
Microglia	decreased	GO:0044325	ion channel binding	4.35018	0.000871517	0.027237
Microglia	decreased	GO:0043492	ATPase activity, coincreasedled to movement of substances	4.33401	0.000891763	0.027237
Microglia	decreased	GO:0044769	ATPase activity, coincreasedled to transmembrane movement of ions, rotational mechanism	4.18311	0.000297361	0.0113528
Microglia	decreased	GO:0048306	calcium-dependent protein binding	4.03909	0.000204558	0.0296422
Cell Type	Direction	Annotation	Pathway	OR	p-value	Adjusted p-value
Monocytes	increased	GO:0042277	peptide binding	88.3458	3.19e-11	6.82e-09
Monocytes	increased	GO:0003729	mRNA binding	88.3458	3.19e-11	6.82e-09
Monocytes	increased	GO:0003735	structural constituent of ribosome	84.8064	1.75e-11	6.22e-09
Monocytes	increased	GO:0019843	rRNA binding	72.8317	3.08e-08	2.75e-06
Monocytes	increased	GO:0005198	structural molecule activity	72.8317	3.08e-08	2.75e-06
Monocytes	decreased	GO:0005507	copper ion binding	72.8317	3.08e-08	2.75e-06
Monocytes	decreased	GO:0016651	oxidoreductase activity, acting on NAD(P)H	70.6487	3.83e-11	6.83e-09
Monocytes	decreased	GO:0016655	oxidoreductase activity, acting on NAD(P)H, quinone or similar compound as acceptor	69.359	3.81e-08	3.13e-06
Monocytes	decreased	GO:0016675	oxidoreductase activity, acting on a heme groincreased of donors	65.0179	2.41e-11	8.35e-09
Monocytes	decreased	GO:0016676	oxidoreductase activity, acting on a heme groincreased of donors, oxygen as acceptor	55.186	2.99e-11	8.35e-09
Monocytes	decreased	GO:0050136	NADH dehydrogenase (quinone) activity	38.2475	4.67e-11	7.13e-09
Monocytes	decreased	GO:0022890	inorganic cation transmembrane transporter activity	33.5689	7.02e-09	8.33e-07
Monocytes	decreased	GO:0008324	cation transmembrane transporter activity	29.0038	0.000228425	0.0152616
Monocytes	decreased	GO:0008137	NADH dehydrogenase (ubiquinone) activity	28.666	1.92e-07	1.47e-05
Monocytes	decreased	GO:0003954	NADH dehydrogenase activity	23.2931	3.12e-11	8.35e-09
Monocytes	decreased	GO:0009055	electron carrier activity	19.7506	0	0
Monocytes	decreased	GO:0015662	ATPase activity, coincreasedled to transmembrane movement of ions, phosphorylative mechanism	19.0972	0.000717636	0.0426196
Monocytes	decreased	GO:0015002	heme-copper terminal oxidase activity	14.9881	0.000225889	0.0152616
Monocytes	decreased	GO:0004129	cytochrome-c oxidase activity	14.0129	1.6e-12	8.54e-10
Monocytes	decreased	GO:0015078	hydrogen ion transmembrane transporter activity	12.5051	0.000436157	0.0274266
Monocytes	decreased	GO:0015077	monovalent inorganic cation transmembrane transporter activity	11.9834	7.43e-11	9.92e-09
Monocytes	decreased	GO:0015081	sodium ion transmembrane transporter activity	11.7717	1.77e-11	8.35e-09
Monocytes	decreased	GO:0051117	ATPase binding	4.86163	0.000192301	0.041114
Cell Type	Direction	Annotation	Pathway	OR	p-value	Adjusted p-value
Oliodendrocytes differenciated	increased	GO:0015631	tubulin binding	62.7683	2.67e-05	0.0149171
Oliodendrocytes differenciated	decreased	GO:0042277	peptide binding	37.875	0.000109329	0.0247751
Oliodendrocytes differenciated	decreased	GO:0015662	ATPase activity, coincreasedled to transmembrane movement of ions, phosphorylative mechanism	37.0996	0.00011588	0.0247751
Oliodendrocytes differenciated	decreased	GO:0019829	cation-transporting ATPase activity	16.8131	2.79e-05	0.0149171
Oliodendrocytes differenciated	decreased	GO:0042625	ATPase coincreasedled ion transmembrane transporter activity	15.2215	4.41e-05	0.0157248
Oliodendrocytes differenciated	decreased	GO:0033218	amide binding	4.22503	2.54e-06	0.00271782
Cell Type	Direction	Annotation	Pathway	OR	p-value	Adjusted p-value
Oliodendrocyte Precursors	decreased	GO:0016655	oxidoreductase activity, acting on NAD(P)H, quinone or similar compound as acceptor	56.4491	3.57e-05	0.010321
Oliodendrocyte Precursors	decreased	GO:0050136	NADH dehydrogenase (quinone) activity	52.4101	4.38e-05	0.010321
Oliodendrocyte Precursors	decreased	GO:0042277	peptide binding	52.4101	4.38e-05	0.010321
Oliodendrocyte Precursors	decreased	GO:0008137	NADH dehydrogenase (ubiquinone) activity	50.5996	4.83e-05	0.010321
Oliodendrocyte Precursors	decreased	GO:0001540	beta-amyloid binding	43.1442	7.5e-05	0.011461
Oliodendrocyte Precursors	decreased	GO:0003954	NADH dehydrogenase activity	26.5193	2.91e-05	0.010321
Oliodendrocyte Precursors	decreased	GO:0051117	ATPase binding	13.3292	7.41e-05	0.011461
Oliodendrocyte Precursors	decreased	GO:0033218	amide binding	12.0674	0.000116474	0.0155638
Cell Type	Direction	Annotation	Pathway	OR	p-value	Adjusted p-value
Purkinje Neurons	increased	GO:0005509	calcium ion binding	32.2974	2.93e-11	1.57e-08
Purkinje Neurons	increased	GO:0019905	syntaxin binding	31.4365	1.06e-08	3.79e-06
Purkinje Neurons	increased	GO:0005516	calmodulin binding	17.4009	0.00013083	0.0349643
Purkinje Neurons	increased	GO:0030507	spectrin binding	14.279	1.48e-06	9.18e-05
Purkinje Neurons	increased	GO:0050998	nitric-oxide synthase binding	13.0555	4.6e-05	0.00153297
Purkinje Neurons	increased	GO:0060589	nucleoside-triphosphatase regulator activity	13.0555	4.6e-05	0.00153297
Purkinje Neurons	increased	GO:0005525	GTP binding	12.4291	2.06e-11	1.57e-08
Purkinje Neurons	increased	GO:0015399	primary active transmembrane transporter activity	10.5723	2.36e-10	1.26e-07
Purkinje Neurons	increased	GO:0016247	channel regulator activity	10.5562	2.89e-05	0.0011409
Purkinje Neurons	increased	GO:0051018	protein kinase A binding	9.78958	0.00015042	0.00434592
Purkinje Neurons	increased	GO:0031420	alkali metal ion binding	9.7777	0.000551074	0.0115509
Purkinje Neurons	increased	GO:0017124	SH3 domain binding	8.19558	3.33e-06	0.000161702
Purkinje Neurons	increased	GO:0022890	inorganic cation transmembrane transporter activity	8.17461	2.27e-09	1.57e-07
Purkinje Neurons	increased	GO:0019001	guanyl nucleotide binding	8.14696	0.00104651	0.0186454
Purkinje Neurons	increased	GO:0008324	cation transmembrane transporter activity	7.90642	4.35e-10	6.01e-08
Purkinje Neurons	increased	GO:0046873	metal ion transmembrane transporter activity	7.51975	0.00139116	0.0209458
Purkinje Neurons	increased	GO:0019208	phosphatase regulator activity	7.51975	0.00139116	0.0209458
Purkinje Neurons	increased	GO:0022853	active ion transmembrane transporter activity	7.47432	5.43e-05	0.00162496
Purkinje Neurons	increased	GO:0003924	GTPase activity	7.27159	2.43e-08	9.59e-07
Purkinje Neurons	increased	GO:0005096	GTPase activator activity	7.21965	0.000189615	0.00519741
Purkinje Neurons	increased	GO:0017075	syntaxin-1 binding	7.02284	1e-05	0.00042937
Purkinje Neurons	increased	GO:0030276	clathrin binding	6.9079	0.000663141	0.0133754
Purkinje Neurons	increased	GO:0072509	divalent inorganic cation transmembrane transporter activity	6.29478	1.22e-07	4.21e-06
Purkinje Neurons	increased	GO:0003735	structural constituent of ribosome	6.1799	0.00107007	0.0187524
Purkinje Neurons	increased	GO:0036442	hydrogen-exporting ATPase activity	6.10853	0.0029248	0.0386002
Purkinje Neurons	increased	GO:0034236	protein kinase A catalytic subunit binding	6.06234	4.7e-06	0.000218306
Purkinje Neurons	increased	GO:0016820	hydrolase activity, acting on acid anhydrides, catalyzing transmembrane movement of substances	5.95671	3.26e-05	0.00120234
Purkinje Neurons	increased	GO:0004518	nuclease activity	5.91037	5.84e-06	0.000259997
Purkinje Neurons	increased	GO:0015405	P-P-bond-hydrolysis-driven transmembrane transporter activity	5.8705	0.0013342	0.0209458
Purkinje Neurons	increased	GO:0035254	glutamate receptor binding	5.8705	0.0013342	0.0209458
Purkinje Neurons	increased	GO:0035255	ionotropic glutamate receptor binding	5.78609	1.48e-11	4.09e-09
Purkinje Neurons	increased	GO:0015662	ATPase activity, coincreasedled to transmembrane movement of ions, phosphorylative mechanism	5.70746	6.32e-09	2.91e-07
Purkinje Neurons	increased	GO:0019829	cation-transporting ATPase activity	5.59057	0.00164532	0.0237683
Purkinje Neurons	increased	GO:0005200	structural constituent of cytoskeleton	5.49279	1.08e-09	9.94e-08
Purkinje Neurons	increased	GO:0047485	protein N-terminus binding	5.48466	0.000751013	0.014597
Purkinje Neurons	increased	GO:0016791	phosphatase activity	5.32247	0.000432611	0.00542731
Purkinje Neurons	increased	GO:0015459	potassium channel regulator activity	5.20266	0.00022215	0.00328905
Purkinje Neurons	increased	GO:0022803	passive transmembrane transporter activity	5.19971	1.63e-06	9.18e-05
Purkinje Neurons	increased	GO:0005230	extracellular ligand-gated ion channel activity	5.17901	5.94e-09	2.91e-07
Purkinje Neurons	increased	GO:0005234	extracellular-glutamate-gated ion channel activity	5.07534	3.05e-07	9.37e-06
Purkinje Neurons	increased	GO:0019888	protein phosphatase regulator activity	5.03387	0.000272834	0.00376511
Purkinje Neurons	increased	GO:0005244	voltage-gated ion channel activity	4.91251	3.56e-08	3.8e-06
Purkinje Neurons	increased	GO:0005245	voltage-gated calcium channel activity	4.896	0.0013207	0.0209458
Purkinje Neurons	increased	GO:0005248	voltage-gated sodium channel activity	4.74405	5.92e-08	5.28e-06
Purkinje Neurons	increased	GO:0015267	channel activity	4.65198	2.59e-06	0.000132044
Purkinje Neurons	increased	GO:0005216	ion channel activity	4.48541	0.00456649	0.0331671
Purkinje Neurons	increased	GO:0015079	potassium ion transmembrane transporter activity	4.46413	0.000250208	0.00581462
Purkinje Neurons	increased	GO:0015077	monovalent inorganic cation transmembrane transporter activity	4.26945	0.000340847	0.00759095
Purkinje Neurons	increased	GO:0005272	sodium channel activity	4.19665	3.1e-06	7.77e-05
Purkinje Neurons	increased	GO:0022843	voltage-gated cation channel activity	4.15843	0.000214112	0.00526522
Purkinje Neurons	increased	GO:0042625	ATPase coincreasedled ion transmembrane transporter activity	4.15843	0.000214112	0.00526522
Purkinje Neurons	increased	GO:0042626	ATPase activity, coincreasedled to transmembrane movement of substances	4.15538	3.42e-08	3.8e-06
Purkinje Neurons	increased	GO:0022835	transmitter-gated channel activity	4.15538	3.42e-08	3.8e-06
Purkinje Neurons	increased	GO:0022836	gated channel activity	4.10585	0.000848579	0.0159184
Purkinje Neurons	increased	GO:0022838	substrate-specific channel activity	4.00341	9.67e-06	0.0002054
Purkinje Neurons	increased	GO:0015085	calcium ion transmembrane transporter activity	3.82609	0.000460944	0.00553132
Purkinje Neurons	increased	GO:0022832	voltage-gated channel activity	3.73173	0.0027398	0.0366106
Purkinje Neurons	increased	GO:0015081	sodium ion transmembrane transporter activity	3.7172	2.99e-05	0.0011409
Purkinje Neurons	increased	GO:0030695	GTPase regulator activity	3.70067	7.17e-10	2.56e-07
Purkinje Neurons	increased	GO:0022824	transmitter-gated ion channel activity	3.69889	5.47e-05	0.00162496
Purkinje Neurons	increased	GO:0005262	calcium channel activity	3.6564	4.52e-07	1.25e-05
Purkinje Neurons	increased	GO:0005261	cation channel activity	3.60743	0.000705781	0.00721465
Purkinje Neurons	increased	GO:0005267	potassium channel activity	3.56858	0.00115324	0.0195685
Purkinje Neurons	increased	GO:0019894	kinesin binding	3.54914	4.88e-05	0.00153297
Purkinje Neurons	increased	GO:0032561	guanyl ribonucleotide binding	3.45033	0.00455247	0.0331671
Purkinje Neurons	increased	GO:0044325	ion channel binding	3.45004	0.000216716	0.00328905
Purkinje Neurons	increased	GO:1905030	voltage-gated ion channel activity involved in regulation of postsynaptic membrane potential	3.39236	4.77e-05	0.00153297
Purkinje Neurons	increased	GO:0043492	ATPase activity, coincreasedled to movement of substances	3.36956	0.000703642	0.00721465
Purkinje Neurons	increased	GO:0008022	protein C-terminus binding	3.34135	4.73e-09	1.01e-06
Purkinje Neurons	increased	GO:0044769	ATPase activity, coincreasedled to transmembrane movement of ions, rotational mechanism	3.29516	1.55e-06	9.18e-05
Purkinje Neurons	increased	GO:0051082	unfolded protein binding	3.27937	0.000466167	0.00996665
Purkinje Neurons	increased	GO:0046961	proton-transporting ATPase activity, rotational mechanism	3.26855	0.00228914	0.0191455
Purkinje Neurons	increased	GO:0008017	microtubule binding	3.24045	0.0038937	0.0298517
Purkinje Neurons	increased	GO:0008066	glutamate receptor activity	3.23801	1.1e-05	0.00021726
Purkinje Neurons	increased	GO:0050839	cell adhesion molecule binding	3.23271	7.33e-06	0.000168577
Purkinje Neurons	increased	GO:0001664	G-protein coincreasedled receptor binding	3.23116	0.000848782	0.0159184
Purkinje Neurons	increased	GO:0008047	enzyme activator activity	3.21995	0.000400319	0.00526133
Purkinje Neurons	increased	GO:0048306	calcium-dependent protein binding	3.21602	1.86e-05	0.000341776
Purkinje Neurons	increased	GO:0015631	tubulin binding	3.13617	0.000504362	0.00573649
Purkinje Neurons	increased	GO:0000149	SNARE binding	3.12084	5.38e-11	5.75e-08
Purkinje Neurons	increased	GO:0004970	ionotropic glutamate receptor activity	3.1151	0.00127825	0.0121654
Purkinje Neurons	increased	GO:0004721	phosphoprotein phosphatase activity	3.07843	0.00215749	0.018945
Purkinje Neurons	increased	mmu04114	Oocyte meiosis	3.07487	4.27e-09	1.01e-06
Purkinje Neurons	increased	mmu04912	GnRH signaling pathway	3.06375	0.000221642	0.00526522
Purkinje Neurons	increased	mmu04911	Insulin secretion	3.02298	0.00141465	0.0210037
Purkinje Neurons	increased	mmu04916	Melanogenesis	2.9828	1.48e-06	9.18e-05
Purkinje Neurons	increased	mmu04915	Estrogen signaling pathway	2.98267	0.000519609	0.00573649
Purkinje Neurons	increased	mmu05214	Glioma	2.96341	3.42e-08	3.8e-06
Purkinje Neurons	increased	mmu04921	Oxytocin signaling pathway	2.93733	0.00197919	0.0182086
Purkinje Neurons	increased	mmu04713	Circadian entrainment	2.91041	0.00188322	0.0268422
Purkinje Neurons	increased	mmu04961	Endocrine and other factor-regulated calcium reabsorption	2.89657	5.83e-08	5.28e-06
Purkinje Neurons	increased	mmu05014	Amyotrophic lateral sclerosis (ALS)	2.89597	0.00219652	0.018945
Purkinje Neurons	increased	mmu04723	Retrograde endocannabinoid signaling	2.87472	0.00206512	0.0286703
Purkinje Neurons	increased	mmu04722	Neurotrophin signaling pathway	2.87472	0.00206512	0.0286703
Purkinje Neurons	increased	mmu04721	Synaptic vesicle cycle	2.87186	0.00139005	0.0209458
Purkinje Neurons	increased	mmu04720	Long-term potentiation	2.84	0.00102552	0.0186454
Purkinje Neurons	increased	mmu05010	Alzheimer's disease	2.81662	0.00268982	0.021835
Purkinje Neurons	increased	mmu04925	Aldosterone synthesis and secretion	2.78869	2.35e-06	0.000125444
Purkinje Neurons	increased	mmu04924	Renin secretion	2.73239	0.000144686	0.00249583
Purkinje Neurons	increased	mmu04922	Glucagon signaling pathway	2.68923	5.69e-09	1.01e-06
Purkinje Neurons	increased	mmu04024	cAMP signaling pathway	2.67494	4.08e-07	3.11e-05
Purkinje Neurons	increased	mmu04144	Endocytosis	2.67494	4.08e-07	3.11e-05
Purkinje Neurons	increased	mmu04022	cGMP-PKG signaling pathway	2.62402	0.000208929	0.00526522
Purkinje Neurons	increased	mmu04020	Calcium signaling pathway	2.61517	0.00022642	0.00328905
Purkinje Neurons	increased	mmu04261	Adrenergic signaling in cardiomyocytes	2.61269	0.000309586	0.00704144
Purkinje Neurons	increased	mmu04750	Inflammatory mediator regulation of TRP channels	2.60649	0.00298806	0.0389541
Purkinje Neurons	increased	mmu04070	Phosphatidylinositol signaling system	2.56201	0.0012596	0.0207155
Purkinje Neurons	increased	mmu04727	GABAergic synapse	2.55466	0.0010394	0.0186454
Purkinje Neurons	increased	mmu04726	Serotonergic synapse	2.54089	0.00322126	0.0254019
Purkinje Neurons	increased	mmu04725	Cholinergic synapse	2.4876	3.42e-05	0.00122022
Purkinje Neurons	increased	mmu04724	Glutamatergic synapse	2.4651	0.00125947	0.0207155
Purkinje Neurons	increased	mmu04728	Dopaminergic synapse	2.32278	7.26e-07	5.17e-05
Purkinje Neurons	increased	mmu04730	Long-term depression	2.31487	0.000363095	0.0079214
Purkinje Neurons	increased	mmu04971	Gastric acid secretion	2.3098	0.000683787	0.0135365
Purkinje Neurons	increased	mmu04970	Salivary secretion	2.24044	0.000655541	0.0133754
Purkinje Neurons	increased	mmu00020	Citrate cycle (TCA cycle)	2.20448	2.54e-05	0.00104599
Purkinje Neurons	increased	mmu04740	Olfactory transduction	2.19404	0.000166432	0.004682
Purkinje Neurons	increased	mmu05033	Nicotine addiction	2.17946	0.00250282	0.0338742
Purkinje Neurons	increased	mmu05032	Morphine addiction	2.15823	0.00021497	0.00526522
Purkinje Neurons	increased	mmu05031	Amphetamine addiction	2.15079	0.000221159	0.00526522
Purkinje Neurons	decreased	GO:0003735	structural constituent of ribosome	2.11113	0.00106668	0.0105144
Purkinje Neurons	decreased	GO:0019843	rRNA binding	1.84421	0.00157365	0.0230443
Purkinje Neurons	decreased	GO:0005496	steroid binding	0.107392	0.00250333	0.0338742
Purkinje Neurons	decreased	GO:0005198	structural molecule activity	0.10056	0.00115314	0.0195685
Cell Type	Direction	Annotation	Pathway	OR	p-value	Adjusted p-value
Unipolar Brush Cells	increased	GO:0016887	ATPase activity	70.2056	1.46e-17	1.96e-15
Unipolar Brush Cells	increased	GO:0005509	calcium ion binding	70.2056	1.46e-17	1.96e-15
Unipolar Brush Cells	increased	GO:0016651	oxidoreductase activity, acting on NAD(P)H	70.2056	1.46e-17	1.96e-15
Unipolar Brush Cells	increased	GO:0016655	oxidoreductase activity, acting on NAD(P)H, quinone or similar compound as acceptor	64.8009	1.2e-11	1.07e-09
Unipolar Brush Cells	increased	GO:0060590	ATPase regulator activity	49.7276	4.6e-12	2.12e-10
Unipolar Brush Cells	increased	GO:0019905	syntaxin binding	46.1356	2.2e-10	1.68e-08
Unipolar Brush Cells	increased	GO:0050998	nitric-oxide synthase binding	41.7824	1.48e-12	8.15e-11
Unipolar Brush Cells	increased	GO:0016675	oxidoreductase activity, acting on a heme groincreased of donors	40.7341	0	0
Unipolar Brush Cells	increased	GO:0016676	oxidoreductase activity, acting on a heme groincreased of donors, oxygen as acceptor	40.7341	0	0
Unipolar Brush Cells	increased	GO:0050780	dopamine receptor binding	38.6948	3.05e-11	2.51e-09
Unipolar Brush Cells	increased	GO:0015399	primary active transmembrane transporter activity	37.2879	1e-11	9.72e-10
Unipolar Brush Cells	increased	GO:0050136	NADH dehydrogenase (quinone) activity	32.7554	1.31e-05	0.0139559
Unipolar Brush Cells	increased	GO:0022890	inorganic cation transmembrane transporter activity	30.9455	0	0
Unipolar Brush Cells	increased	GO:0008324	cation transmembrane transporter activity	29.44	0	0
Unipolar Brush Cells	increased	GO:0022853	active ion transmembrane transporter activity	26.9532	5.11e-07	2.6e-05
Unipolar Brush Cells	increased	GO:0008137	NADH dehydrogenase (ubiquinone) activity	20.7303	0	0
Unipolar Brush Cells	increased	GO:0017075	syntaxin-1 binding	20.1484	0	0
Unipolar Brush Cells	increased	GO:0030276	clathrin binding	19.5685	1.67e-05	0.000662608
Unipolar Brush Cells	increased	GO:0003954	NADH dehydrogenase activity	19.2368	0	0
Unipolar Brush Cells	increased	GO:0036442	hydrogen-exporting ATPase activity	18.4162	2.14e-05	0.000761697
Unipolar Brush Cells	increased	GO:0009055	electron carrier activity	17.3919	2.7e-05	0.000929628
Unipolar Brush Cells	increased	GO:0016820	hydrolase activity, acting on acid anhydrides, catalyzing transmembrane movement of substances	17.2264	1.23e-11	4.86e-10
Unipolar Brush Cells	increased	GO:0015405	P-P-bond-hydrolysis-driven transmembrane transporter activity	16.0986	0	0
Unipolar Brush Cells	increased	GO:0035254	glutamate receptor binding	15.5896	0.000254724	0.00735945
Unipolar Brush Cells	increased	GO:0015662	ATPase activity, coincreasedled to transmembrane movement of ions, phosphorylative mechanism	13.6231	1.02e-07	5.73e-06
Unipolar Brush Cells	increased	GO:0015002	heme-copper terminal oxidase activity	13.3092	1.01e-09	6.77e-08
Unipolar Brush Cells	increased	GO:0019829	cation-transporting ATPase activity	13.3054	1.21e-07	6.49e-06
Unipolar Brush Cells	increased	GO:0047485	protein N-terminus binding	13.1569	2.48e-12	2.94e-10
Unipolar Brush Cells	increased	GO:0022804	active transmembrane transporter activity	11.819	7.52e-10	5.36e-08
Unipolar Brush Cells	increased	GO:0004129	cytochrome-c oxidase activity	11.5479	1.83e-08	1.15e-06
Unipolar Brush Cells	increased	GO:0015078	hydrogen ion transmembrane transporter activity	11.0066	2.14e-06	9.51e-05
Unipolar Brush Cells	increased	GO:0015077	monovalent inorganic cation transmembrane transporter activity	10.6115	0.00457715	0.040604
Unipolar Brush Cells	increased	GO:0042625	ATPase coincreasedled ion transmembrane transporter activity	10.5872	6.7e-07	3.26e-05
Unipolar Brush Cells	increased	GO:0042626	ATPase activity, coincreasedled to transmembrane movement of substances	10.1623	9.22e-08	3.18e-06
Unipolar Brush Cells	increased	GO:0015081	sodium ion transmembrane transporter activity	9.41723	8.72e-05	0.00266393
Unipolar Brush Cells	increased	GO:0044325	ion channel binding	8.90119	0.00162611	0.0413884
Unipolar Brush Cells	increased	GO:0043492	ATPase activity, coincreasedled to movement of substances	8.41889	7.27e-12	7.77e-10
Unipolar Brush Cells	increased	GO:0044769	ATPase activity, coincreasedled to transmembrane movement of ions, rotational mechanism	8.32469	5.44e-06	0.000150097
Unipolar Brush Cells	increased	GO:0001664	G-protein coincreasedled receptor binding	8.12958	4.26e-08	2.53e-06
Unipolar Brush Cells	increased	GO:0048306	calcium-dependent protein binding	7.86167	1.92e-06	8.9e-05
Unipolar Brush Cells	increased	GO:0015631	tubulin binding	7.56616	3.64e-06	0.000111618
Unipolar Brush Cells	increased	GO:0000149	SNARE binding	7.12472	0	0
Unipolar Brush Cells	increased	mmu00190	Oxidative phosphorylation	6.85218	0.00143098	0.0207868
Unipolar Brush Cells	increased	mmu04912	GnRH signaling pathway	6.71204	1.96e-05	0.000721379
Unipolar Brush Cells	increased	mmu04911	Insulin secretion	6.71204	1.96e-05	0.000721379
Unipolar Brush Cells	increased	mmu04916	Melanogenesis	6.27355	1.6e-05	0.000400697
Unipolar Brush Cells	increased	mmu04915	Estrogen signaling pathway	6.13137	3.77e-05	0.00125984
Unipolar Brush Cells	increased	mmu01200	Carbon metabolism	6.11682	0.000842826	0.015508
Unipolar Brush Cells	increased	mmu04270	Vascular smooth muscle contraction	5.69949	6.37e-05	0.00206375
Unipolar Brush Cells	increased	mmu04713	Circadian entrainment	5.58698	7.34e-05	0.00230916
Unipolar Brush Cells	increased	mmu04961	Endocrine and other factor-regulated calcium reabsorption	5.51202	0.00137517	0.0207868
Unipolar Brush Cells	increased	mmu05016	Huntington's disease	5.10735	0.00196067	0.0245975
Unipolar Brush Cells	increased	mmu04721	Synaptic vesicle cycle	5.01522	0.00213278	0.0255933
Unipolar Brush Cells	increased	mmu04720	Long-term potentiation	4.99895	0.000831076	0.0233795
Unipolar Brush Cells	increased	mmu05012	Parkinson's disease	4.9988	0.000963732	0.0166244
Unipolar Brush Cells	increased	mmu05010	Alzheimer's disease	4.94497	0.00516021	0.0431581
Unipolar Brush Cells	increased	mmu04925	Aldosterone synthesis and secretion	4.93001	0.00047336	0.0100498
Unipolar Brush Cells	increased	mmu04924	Renin secretion	4.84048	0.00251099	0.0278036
Unipolar Brush Cells	increased	mmu04922	Glucagon signaling pathway	4.59986	0.00317017	0.0333284
Unipolar Brush Cells	increased	mmu04932	Non-alcoholic fatty liver disease (NAFLD)	4.57712	0.00153986	0.0208447
Unipolar Brush Cells	increased	mmu04024	cAMP signaling pathway	4.36598	3.29e-06	0.000140821
Unipolar Brush Cells	increased	mmu04260	Cardiac muscle contraction	4.20767	0.00122344	0.0198628
Unipolar Brush Cells	increased	mmu04022	cGMP-PKG signaling pathway	4.16611	0.00251844	0.0278036
Unipolar Brush Cells	increased	mmu04020	Calcium signaling pathway	4.02561	0.00158601	0.0208447
Unipolar Brush Cells	increased	mmu04261	Adrenergic signaling in cardiomyocytes	3.96238	0.00326039	0.0333284
Unipolar Brush Cells	increased	mmu04750	Inflammatory mediator regulation of TRP channels	3.8677	0.00368891	0.0363621
Unipolar Brush Cells	increased	mmu04728	Dopaminergic synapse	3.81295	0.000380324	0.00874744
Unipolar Brush Cells	increased	mmu04972	Pancreatic secretion	3.76818	0.00073253	0.0144413
Unipolar Brush Cells	increased	mmu04971	Gastric acid secretion	3.35467	0.000181341	0.00538481
Unipolar Brush Cells	increased	mmu04970	Salivary secretion	3.33683	0.0046194	0.040604
Unipolar Brush Cells	increased	mmu00010	Glycolysis / Gluconeogenesis	3.30939	0.00152157	0.0396721
Unipolar Brush Cells	increased	mmu04976	Bile secretion	3.06398	0.00470771	0.040604
Unipolar Brush Cells	increased	mmu01230	Biosynthesis of amino acids	2.95339	0.00386801	0.0368128
Unipolar Brush Cells	increased	mmu04744	Phototransduction	2.69887	0.000949997	0.0260397
Unipolar Brush Cells	increased	mmu05031	Amphetamine addiction	2.53142	0.00107623	0.0287623
Unipolar Brush Cells	decreased	GO:0005496	steroid binding	7.04539	1.37e-05	0.000564749
Cell Type	Direction	Annotation	Pathway	OR	p-value	Adjusted p-value
Vascular Leptomeningeal Cells	increased	GO:0005509	calcium ion binding	243.77	6.99e-07	0.000373625
Vascular Leptomeningeal Cells	increased	GO:0005520	insulin-like growth factor binding	125.446	4.34e-06	0.000927937
Vascular Leptomeningeal Cells	increased	GO:0005518	collagen binding	102.732	2.58e-07	0.000276016
Vascular Leptomeningeal Cells	increased	GO:0005501	retinoid binding	96.2093	9.18e-06	0.00163513
Vascular Leptomeningeal Cells	increased	GO:1901681	sulfur compound binding	67.4531	3.57e-09	6.37e-07
Vascular Leptomeningeal Cells	increased	GO:0005539	glycosaminoglycan binding	57.5505	2.35e-06	0.000676511
Vascular Leptomeningeal Cells	increased	GO:0003735	structural constituent of ribosome	56.4673	2.53e-06	0.000676511
Vascular Leptomeningeal Cells	increased	GO:0019838	growth factor binding	52.9883	1.11e-08	1.69e-06
Vascular Leptomeningeal Cells	increased	GO:0019840	isoprenoid binding	28.6981	0	0
Vascular Leptomeningeal Cells	increased	GO:0019843	rRNA binding	23.9032	5.89e-07	6.3e-05
Vascular Leptomeningeal Cells	increased	GO:0005201	extracellular matrix structural constituent	23.1598	5.26e-05	0.0037463
Vascular Leptomeningeal Cells	increased	GO:0061134	peptidase regulator activity	18.5259	3.21e-07	3.81e-05
Vascular Leptomeningeal Cells	increased	GO:0005198	structural molecule activity	18.5139	2.23e-06	0.00017939
Vascular Leptomeningeal Cells	increased	GO:0008201	heparin binding	15.2656	1.05e-06	0.000102039
Vascular Leptomeningeal Cells	increased	GO:0050840	extracellular matrix binding	14.4934	3.31e-10	8.85e-08
Vascular Leptomeningeal Cells	increased	GO:0008083	growth factor activity	14.0351	6.24e-12	3.33e-09
Vascular Leptomeningeal Cells	increased	mmu05205	Proteoglycans in cancer	8.51097	0.00015826	0.01456
Vascular Leptomeningeal Cells	increased	mmu03010	Ribosome	7.13966	0.000379974	0.0262182
Vascular Leptomeningeal Cells	increased	mmu04512	ECM-receptor interaction	6.81961	0.000136461	0.00911729
Vascular Leptomeningeal Cells	increased	mmu04974	Protein digestion and absorption	4.55618	2.35e-06	0.00017939
Vascular Leptomeningeal Cells	increased	mmu04610	Complement and coagulation cascades	4.18863	0.000695004	0.0383642
Vascular Leptomeningeal Cells	decreased	GO:0050998	nitric-oxide synthase binding	13.9811	0	0
Vascular Leptomeningeal Cells	decreased	GO:0043548	phosphatidylinositol 3-kinase binding	11.547	6.57e-08	8.78e-06
Vascular Leptomeningeal Cells	decreased	GO:0035254	glutamate receptor binding	11.5027	1.32e-06	0.0001175
Vascular Leptomeningeal Cells	decreased	GO:0047485	protein N-terminus binding	10.303	6.04e-05	0.00833125
Vascular Leptomeningeal Cells	decreased	GO:0044325	ion channel binding	10.2937	7.95e-10	1.7e-07
Vascular Leptomeningeal Cells	decreased	GO:0048306	calcium-dependent protein binding	8.57196	1.33e-11	4.73e-09
Cell Type	Direction	Annotation	Pathway	OR	p-value	Adjusted p-value
Vascular Smooth Muscle Cells	increased	GO:0005509	calcium ion binding	22.7808	1.19e-08	4.25e-06
Vascular Smooth Muscle Cells	increased	GO:0005518	collagen binding	22.1715	6.4e-05	0.0085547
Vascular Smooth Muscle Cells	increased	GO:0051015	actin filament binding	20.0573	9.01e-05	0.0107013
Vascular Smooth Muscle Cells	increased	GO:0001948	glycoprotein binding	12.8996	5.1e-10	7.04e-08
Vascular Smooth Muscle Cells	increased	GO:0003735	structural constituent of ribosome	12.0232	0.000527503	0.0331706
Vascular Smooth Muscle Cells	increased	GO:0004857	enzyme inhibitor activity	11.2616	0.000141326	0.0137344
Vascular Smooth Muscle Cells	increased	GO:0003779	actin binding	10.8005	0.00016933	0.0139241
Vascular Smooth Muscle Cells	increased	GO:0019838	growth factor binding	8.96395	0.000377871	0.0269296
Vascular Smooth Muscle Cells	increased	GO:0005200	structural constituent of cytoskeleton	8.64492	5e-10	7.04e-08
Vascular Smooth Muscle Cells	increased	GO:0005198	structural molecule activity	7.59625	0.000233746	0.0178482
Vascular Smooth Muscle Cells	increased	GO:0043236	laminin binding	7.54245	4.62e-07	3.19e-05
Vascular Smooth Muscle Cells	increased	GO:0005178	integrin binding	7.27266	1.4e-05	0.000644274
Vascular Smooth Muscle Cells	increased	GO:0031490	chromatin DNA binding	7.15537	0.000376041	0.0103787
Vascular Smooth Muscle Cells	increased	GO:0031491	nucleosome binding	7.1505	7.77e-07	4.29e-05
Vascular Smooth Muscle Cells	increased	GO:0031492	nucleosomal DNA binding	7.11447	0.000132491	0.00406307
Vascular Smooth Muscle Cells	increased	GO:0050839	cell adhesion molecule binding	6.80409	0.000138597	0.0137344
Vascular Smooth Muscle Cells	increased	GO:0050840	extracellular matrix binding	6.65738	2.56e-06	0.000548173
Vascular Smooth Muscle Cells	increased	mmu04670	Leukocyte transendothelial migration	6.62212	0.000162297	0.0139241
Vascular Smooth Muscle Cells	increased	mmu05412	Arrhythmogenic right ventricular cardiomyopathy (ARVC)	6.58473	2.83e-07	2.6e-05
Vascular Smooth Muscle Cells	increased	mmu05410	Hypertrophic cardiomyopathy (HCM)	6.50499	0.000510139	0.0331706
Vascular Smooth Muscle Cells	increased	mmu05414	Dilated cardiomyopathy	6.44158	0.000629825	0.0133717
Vascular Smooth Muscle Cells	increased	mmu05206	MicroRNAs in cancer	6.35444	5.33e-09	2.85e-06
Vascular Smooth Muscle Cells	increased	mmu05205	Proteoglycans in cancer	6.18561	1.32e-10	1.41e-07
Vascular Smooth Muscle Cells	increased	mmu04921	Oxytocin signaling pathway	5.87396	1.3e-06	0.000347746
Vascular Smooth Muscle Cells	increased	mmu03010	Ribosome	5.76758	7.5e-05	0.0025886
Vascular Smooth Muscle Cells	increased	mmu04270	Vascular smooth muscle contraction	5.73298	0.000449808	0.0110303
Vascular Smooth Muscle Cells	increased	mmu04810	Regulation of actin cytoskeleton	4.93855	5.17e-05	0.00203704
Vascular Smooth Muscle Cells	increased	mmu04024	cAMP signaling pathway	4.92938	0.000479577	0.0110303
Vascular Smooth Muscle Cells	increased	mmu04022	cGMP-PKG signaling pathway	4.20254	1.08e-05	0.00192054
Vascular Smooth Muscle Cells	increased	mmu04510	Focal adhesion	3.8903	1.42e-05	0.0021756
Vascular Smooth Muscle Cells	increased	mmu04611	Platelet activation	3.78412	0.00234376	0.0462057
Cell Type	Direction	Annotation	Pathway	OR	p-value	Adjusted p-value
Oligodendrocytes	increased	GO:0050769	positive regulation of neurogenesis	112.756	5.48e-06	0.01656
Oligodendrocytes	increased	GO:0006633	fatty acid biosynthetic process	42.2363	6.79e-08	3.11e-05
Oligodendrocytes	increased	GO:0043624	cellular protein complex disassembly	42.2363	6.79e-08	3.11e-05
Oligodendrocytes	increased	GO:0051261	protein depolymerization	37.6551	8.02e-06	0.01656
Oligodendrocytes	increased	GO:0016053	organic acid biosynthetic process	24.2582	7.09e-06	0.0017224
Oligodendrocytes	increased	GO:0008344	adult locomotory behavior	19.7273	2.08e-11	2.87e-08
Oligodendrocytes	increased	GO:0007009	plasma membrane organization	19.7273	2.08e-11	2.87e-08
Oligodendrocytes	increased	GO:0008366	axon ensheathment	19.0502	2.07e-12	8.56e-09
Oligodendrocytes	increased	GO:0061564	axon development	15.1889	8.06e-06	0.0018495
Oligodendrocytes	increased	GO:0014003	oligodendrocyte development	14.3454	1.97e-06	0.000676794
Oligodendrocytes	increased	GO:0014015	positive regulation of gliogenesis	13.8555	5.69e-11	4.7e-08
Oligodendrocytes	increased	GO:0014013	regulation of gliogenesis	11.2919	4.12e-07	0.000170232
Oligodendrocytes	increased	GO:0042063	gliogenesis	10.2802	8.32e-07	0.00031227
Oligodendrocytes	increased	GO:0051962	positive regulation of nervous system development	9.07447	1.31e-08	7.72e-06
Oligodendrocytes	increased	GO:0031110	regulation of microtubule polymerization or depolymerization	8.45928	3.56e-06	0.00112973
Oligodendrocytes	increased	GO:0021782	glial cell development	7.87724	6.03e-06	0.00155619
Oligodendrocytes	increased	GO:0031109	microtubule polymerization or depolymerization	7.73702	0.000230797	0.0336119
Oligodendrocytes	increased	GO:0046394	carboxylic acid biosynthetic process	7.43261	0.000281355	0.0363036
Oligodendrocytes	increased	GO:0034330	cell junction organization	7.20436	7.78e-10	5.36e-07
Oligodendrocytes	increased	GO:0034329	cell junction assembly	6.66788	5.38e-11	4.7e-08
Oligodendrocytes	increased	GO:0072330	monocarboxylic acid biosynthetic process	6.60823	6.15e-05	0.0110359
Oligodendrocytes	increased	GO:0051493	regulation of cytoskeleton organization	5.83385	0.000352541	0.042813
Oligodendrocytes	increased	GO:0042552	myelination	5.41292	9.18e-05	0.0158005
Oligodendrocytes	increased	GO:0008610	lipid biosynthetic process	5.29362	0.000253987	0.0349571
Oligodendrocytes	increased	GO:0010975	regulation of neuron projection development	5.07737	2.82e-05	0.00554659
Oligodendrocytes	increased	GO:0007272	ensheathment of neurons	4.40651	0.00038493	0.0454108
Oligodendrocytes	increased	GO:0032291	axon ensheathment in central nervous system	4.08724	1.34e-05	0.0027685
Oligodendrocytes	increased	GO:0022010	central nervous system myelination	4	0.000205596	0.031441
Oligodendrocytes	increased	GO:0032288	myelin assembly	3.93217	0.000236073	0.0336119
Oligodendrocytes	increased	GO:0010001	glial cell differentiation	3.7824	0.000322	0.0403
Oligodendrocytes	increased	GO:0007409	axonogenesis	3.52276	5e-06	0.00137652
Oligodendrocytes	increased	GO:0007422	peripheral nervous system development	3.44525	1.11e-05	0.0024223
Oligodendrocytes	increased	GO:0048709	oligodendrocyte differentiation	3.41451	4.73e-06	0.00137652
Oligodendrocytes	increased	GO:0045687	positive regulation of glial cell differentiation	3.06174	5.04e-05	0.00945106
Oligodendrocytes	increased	GO:0045685	regulation of glial cell differentiation	2.9465	0.000270933	0.0360866
Oligodendrocytes	decreased	GO:0042274	ribosomal small subunit biogenesis	2.84474	0.000124155	0.0197168
Oligodendrocytes	decreased	GO:0000028	ribosomal small subunit assembly	2.79563	0.000106273	0.0175521
